# Supplementary material
Source: MDPI journal article supplement (https://www.mdpi.com/2571-6255/6/5/186)
Supplement: s1 [file s1]

Article

# Modification of soil hydroscopic and chemical properties caused by four recent California, USA megafires

Vera Samburova<sup>1\*</sup>, E. Schneider<sup>2,3</sup>, Christopher P. Rüger<sup>2,3</sup>, Shelby Inouye<sup>4</sup>, Brad Sion<sup>5</sup>, Kevin Axelrod<sup>1,6</sup>, Palina Bahdanovich<sup>1,6</sup>, Lukas Friederici<sup>2,3</sup>, Yasaman Raeofy<sup>1,6</sup>, Markus Berli<sup>4</sup>, Alexandra Lutz<sup>7</sup>, Ralf Zimmermann<sup>2,3,8</sup>, Hans Moosmüller<sup>1</sup>

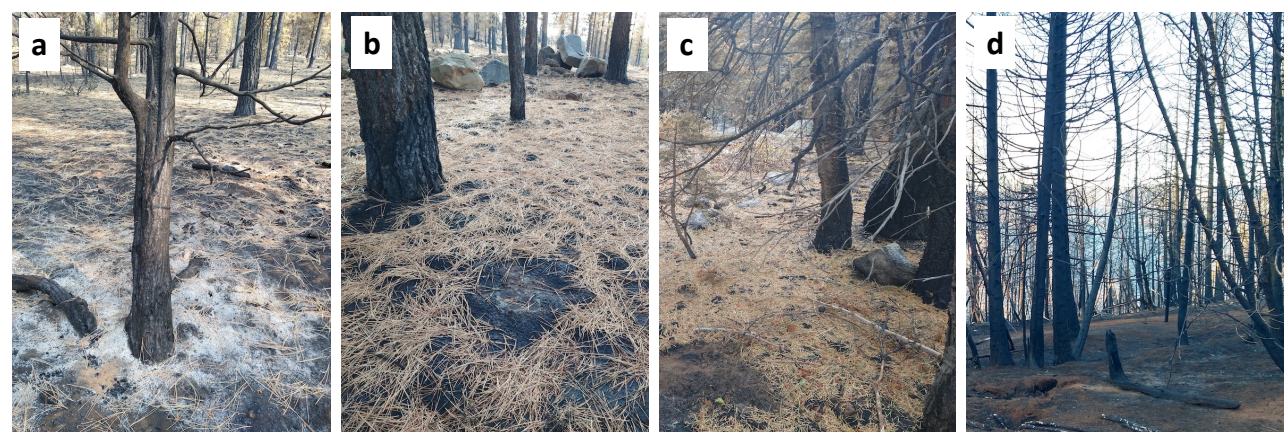

**Figure S1.** Pictures of the four sites selected for the WDPT tests performed in the field and for sampling of ash and soil samples: (a) Dixie fire, (b) Beckwourth Complex fires, (c) Caldor fire, (d) Mosquito fire.

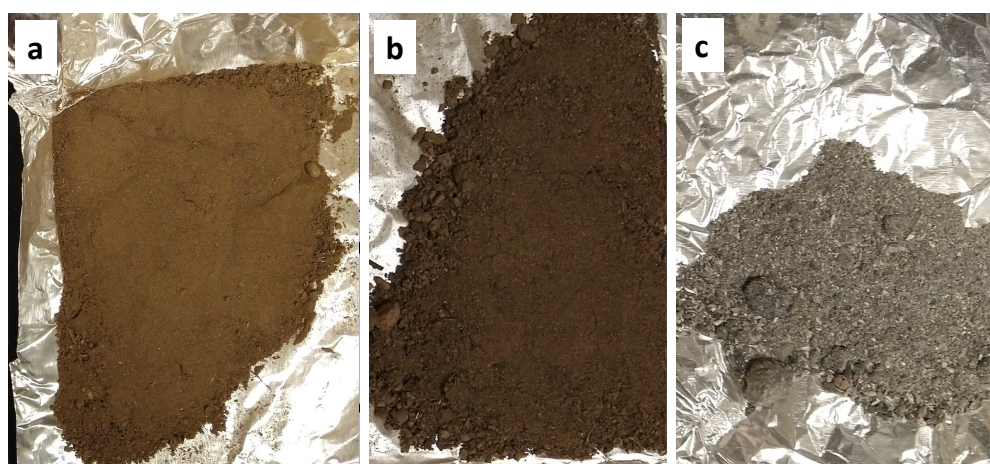

**Figure S2.** Three types of the collected samples: (a) ash, (b) burned soil, (c) unburned (or control) soil. The samples on these pictures were collected right after the Dixie fire.



# Supplementary Material

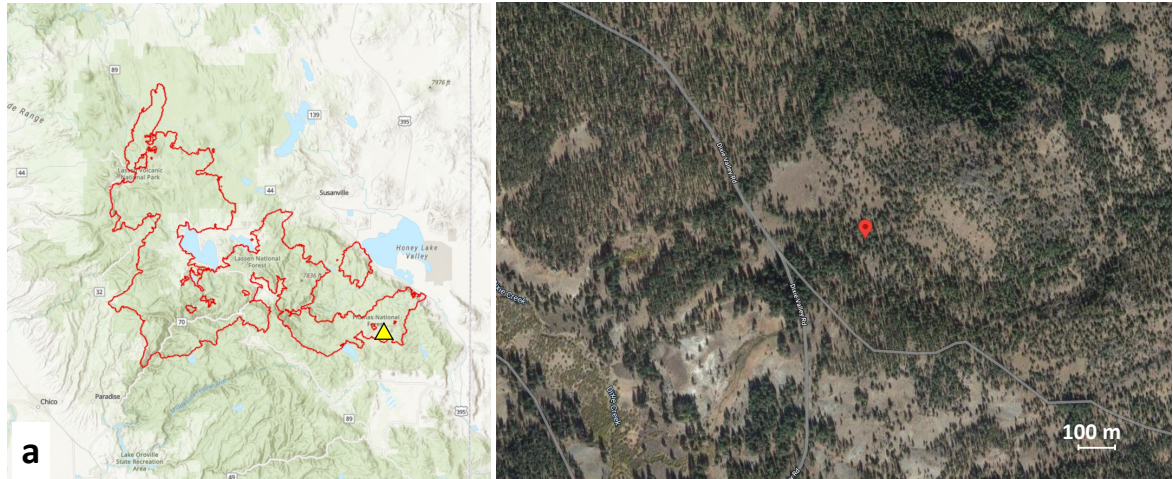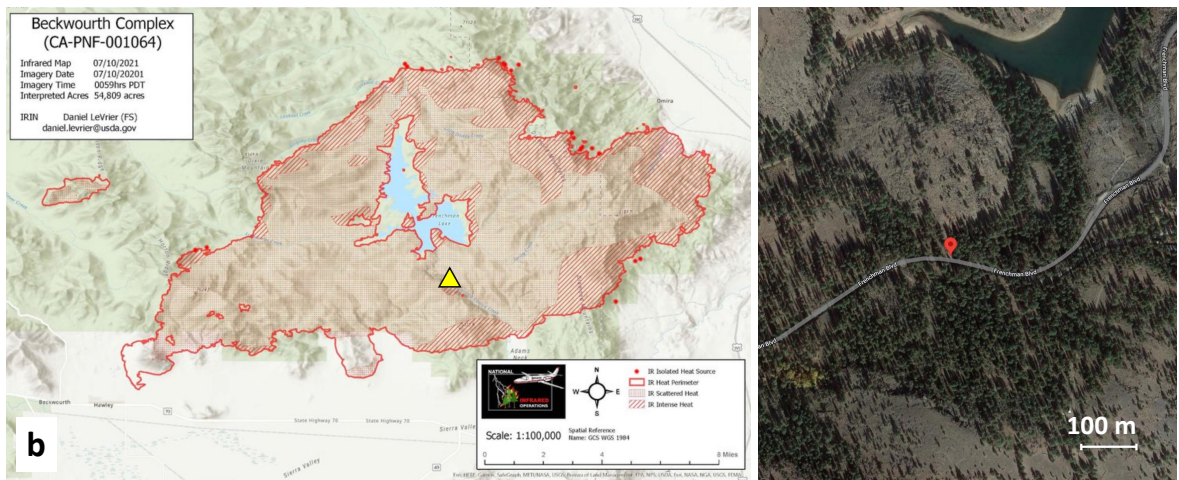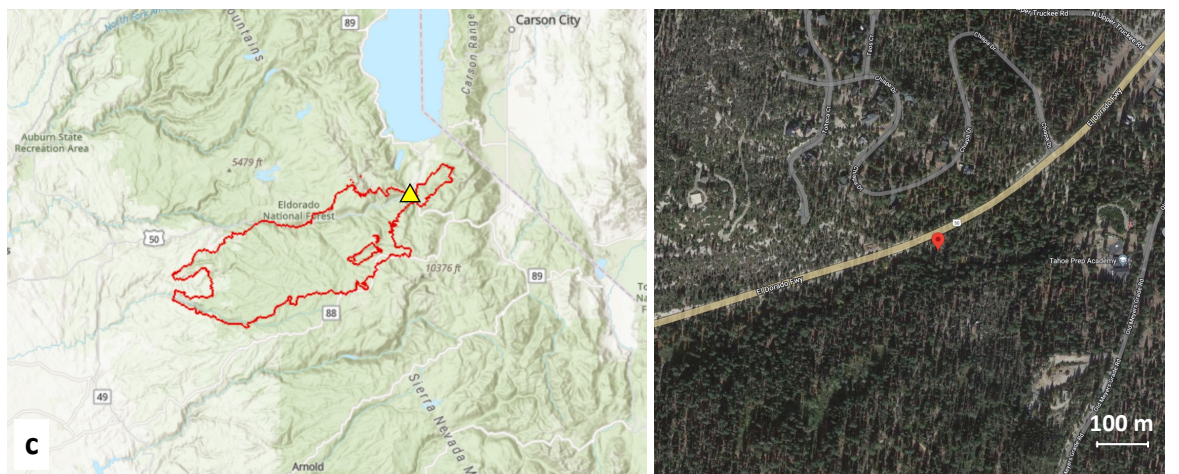



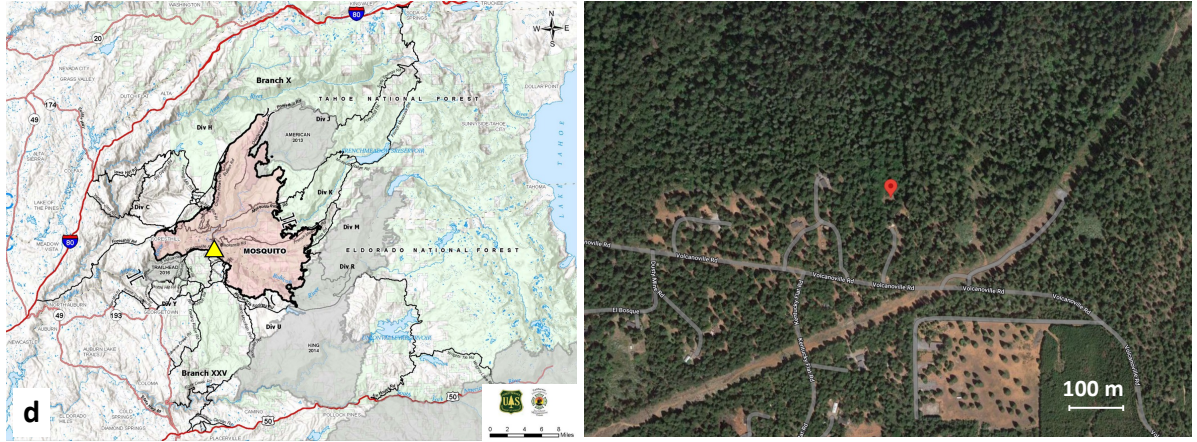

**Figure S3.** Maps and sampling sites: (a) Dixie fire, (b) Beckwourth Complex fires, (c) Caldor fire, (d) Mosquito fire (maps adopted from Google Maps web and U.S. Forest Service).

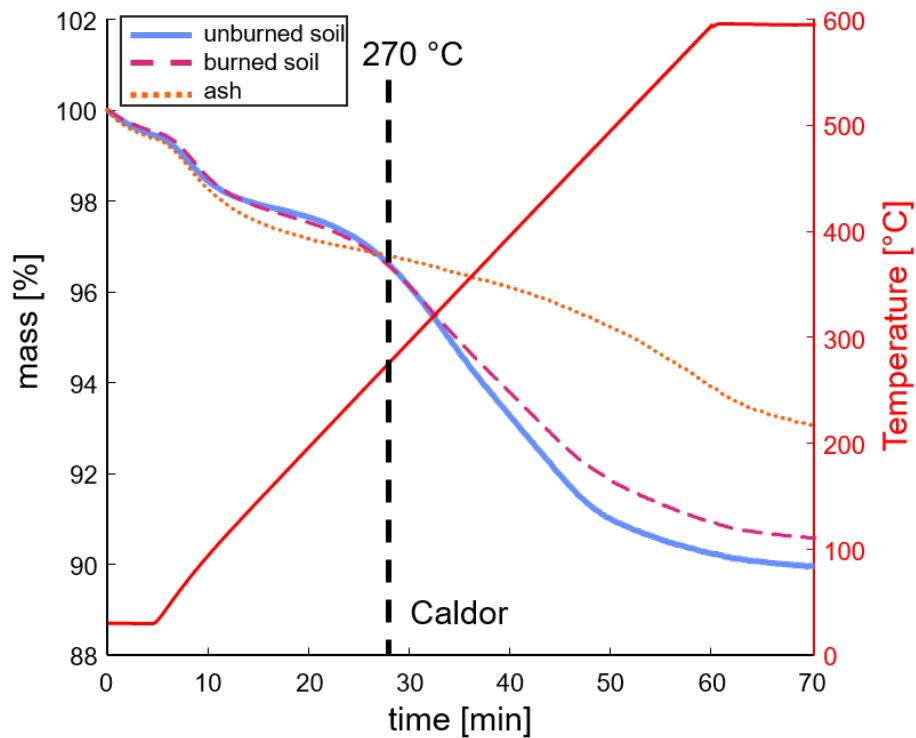

**Figure S4.** Thermogram (mass loss, left y-axis) of averaged triplicates for ash (orange dotted line), control soil (blue solid line) and burned soil (magenta dashed line) of the Caldor fire with temperature program indicated by red solid line (right y-axis). The ash revealed the lowest mass loss (~7 w-%), whereas control and burned soil showed very similar maximum mass loss at around 9-10 w-% with slightly higher evaporation for the control soil.

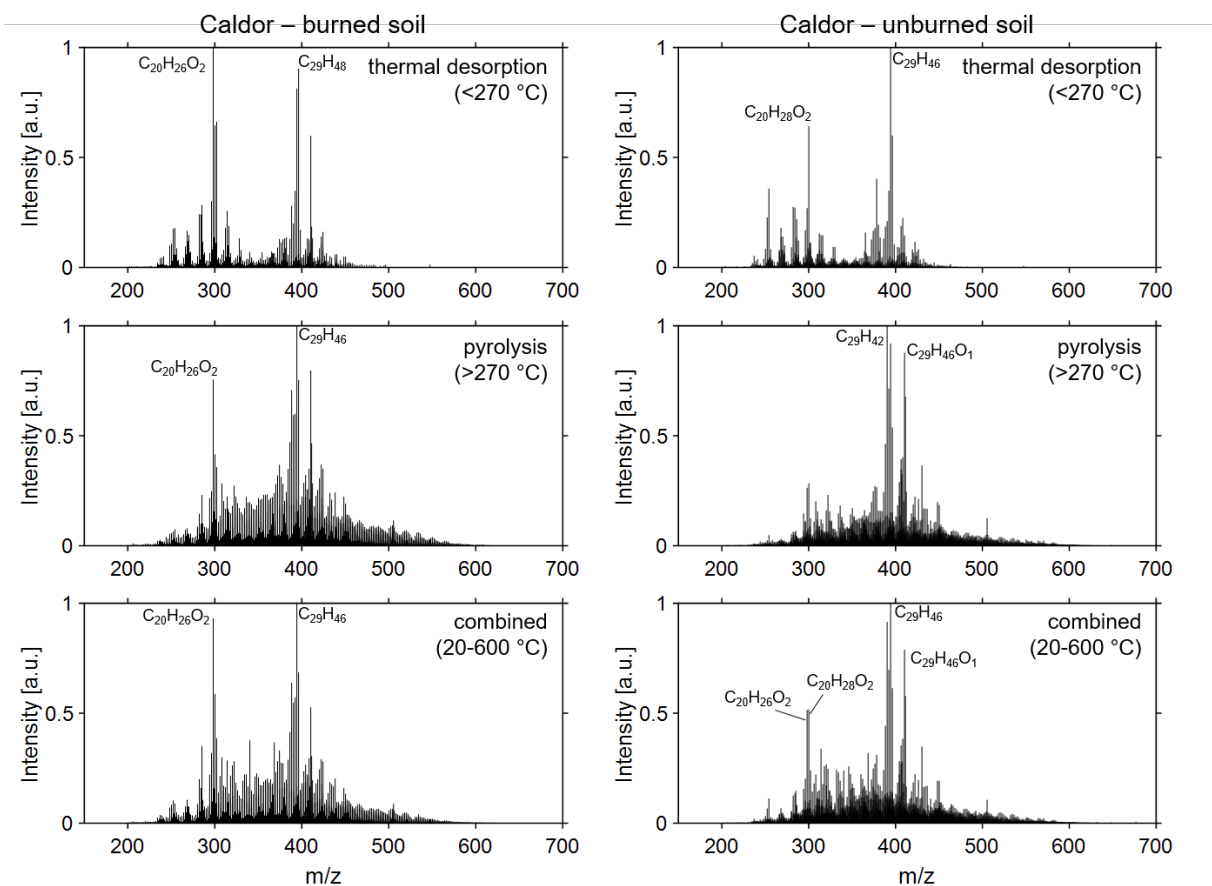

**Figure S5.** Normalized average mass spectra of assigned elemental compositions for Caldor burned soil (left) and control soil (right) separated into thermal desorption (20–270 °C, top), pyrolysis phase (270–600 °C, middle) as well as an average over the whole temperature range (20–600 °C, bottom).

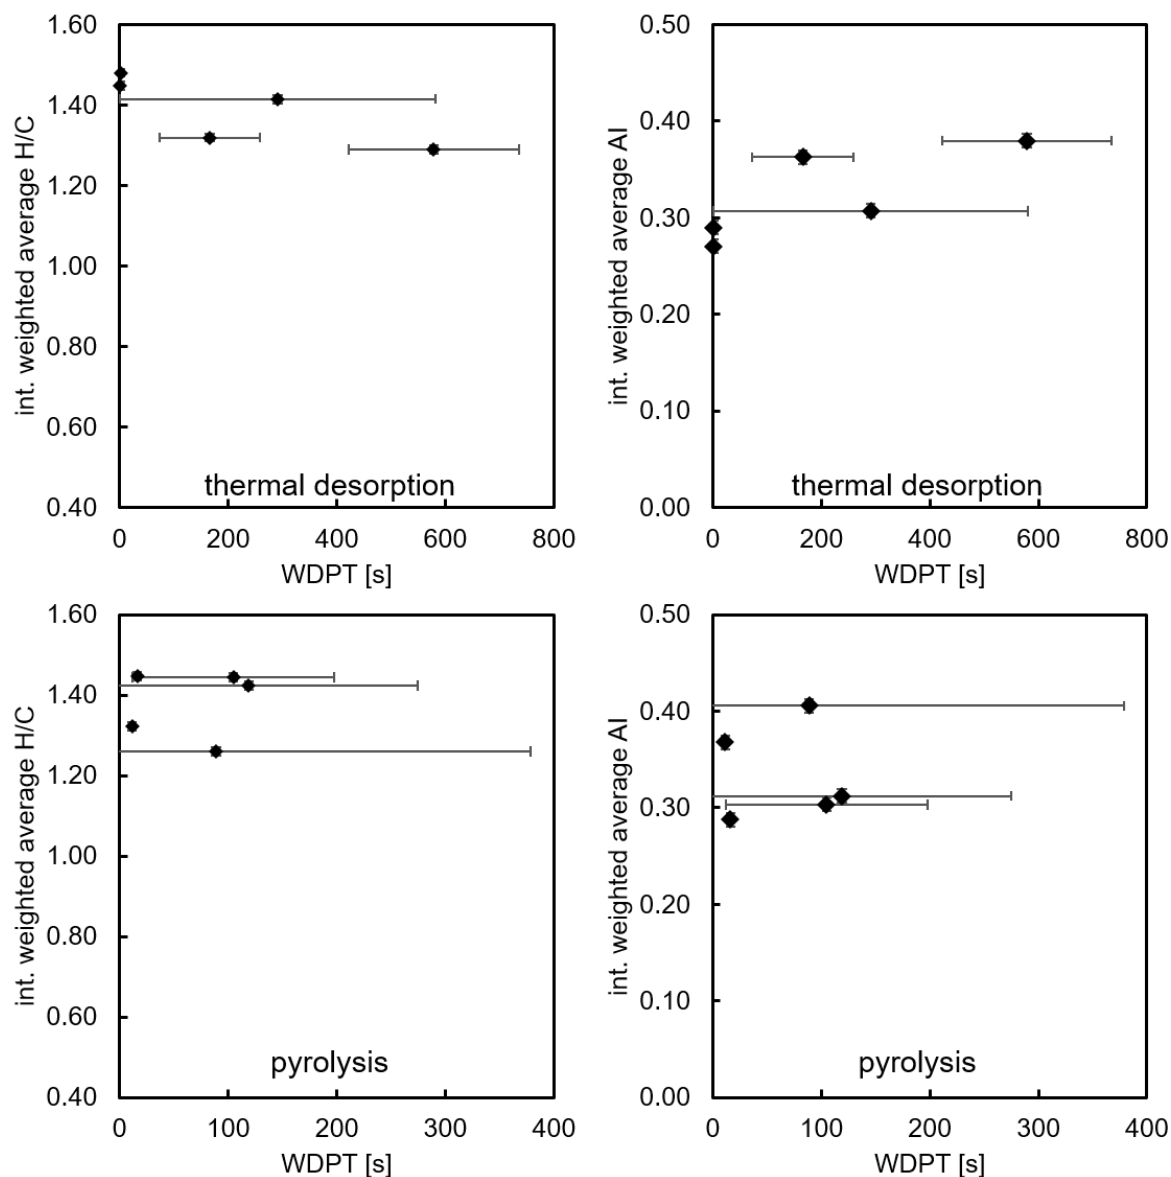

**Figure S6.** Water drop penetration times (WDPT) [s] versus intensity weighted average hydrogen-to-carbon ratio (H/C) and aromaticity index (AI) for the thermal desorption (20–270 °C, top) and pyrolysis (270–600 °C, bottom) phase for five soil samples (Caldor, Beckwourth, Dixie). No trend is apparent from the evolved gas mixture during pyrolysis, whereas a slight correlation might be given for the constituents released during thermal desorption. Error bars indicate standard deviation.

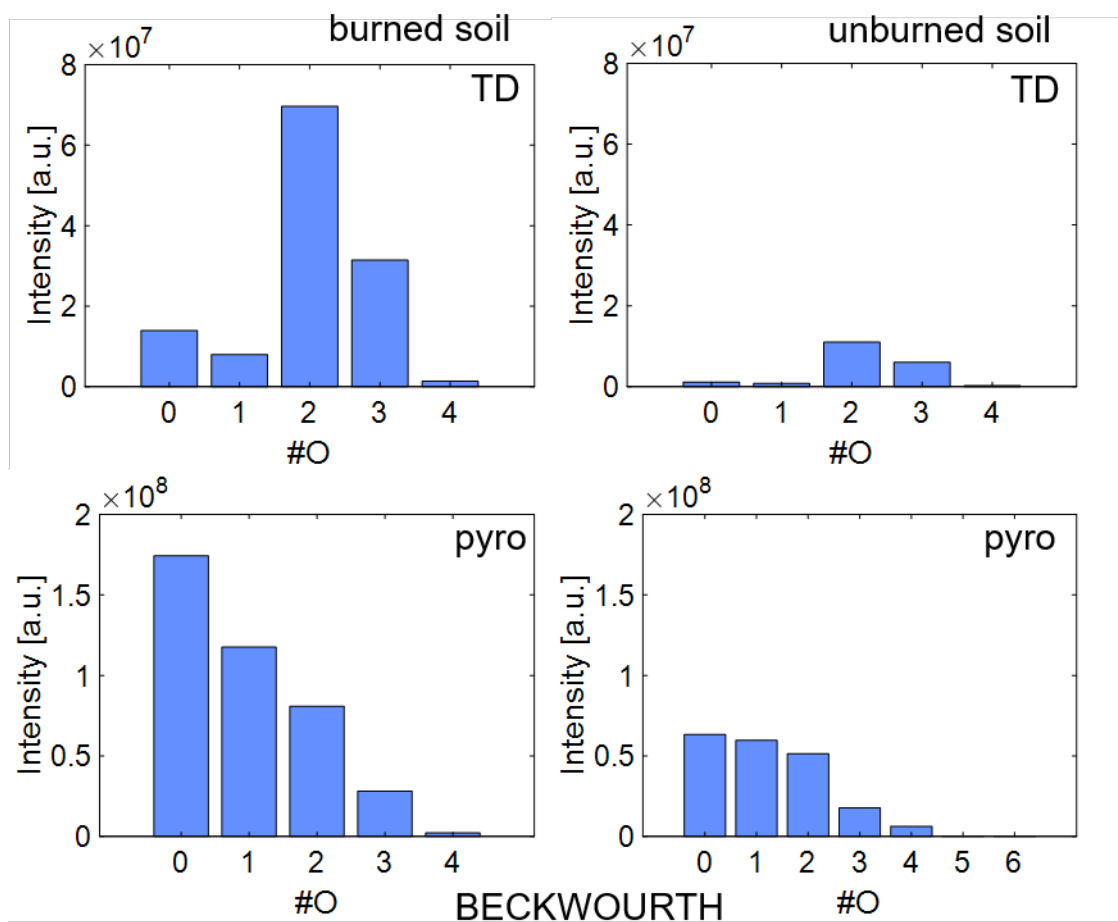

**Figure S7.** Oxygen number distribution (sum of intensity of every compound with the respective number of oxygen) of burned soil (left) and control soil (right) from Beckwourth fire divided into thermal desorption (TD, 20–270 °C, top) and pyrolysis phase (pyro, 270–600 °C bottom). Absolute intensities have been normalized by the deployed sample weight.

### WDPT test, unburned soils

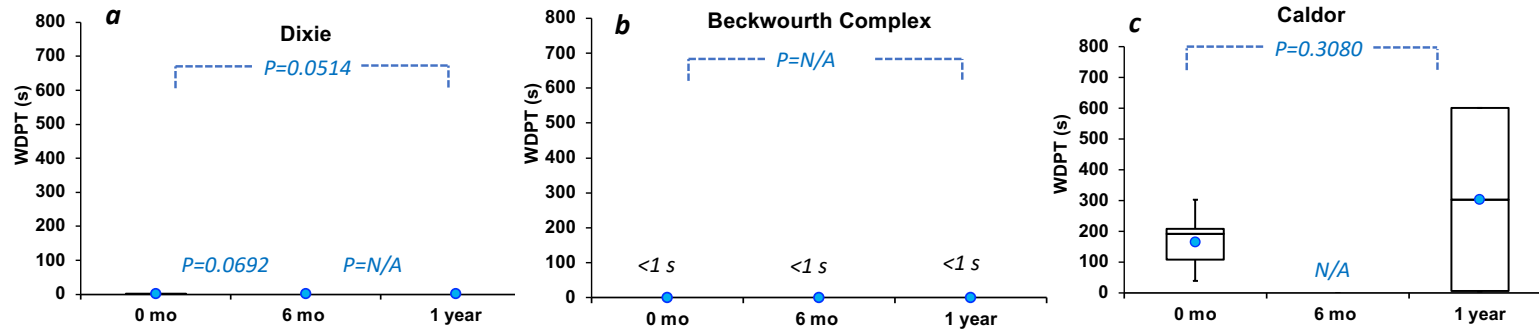

### Apparent Contact Angle analysis, unburned soils

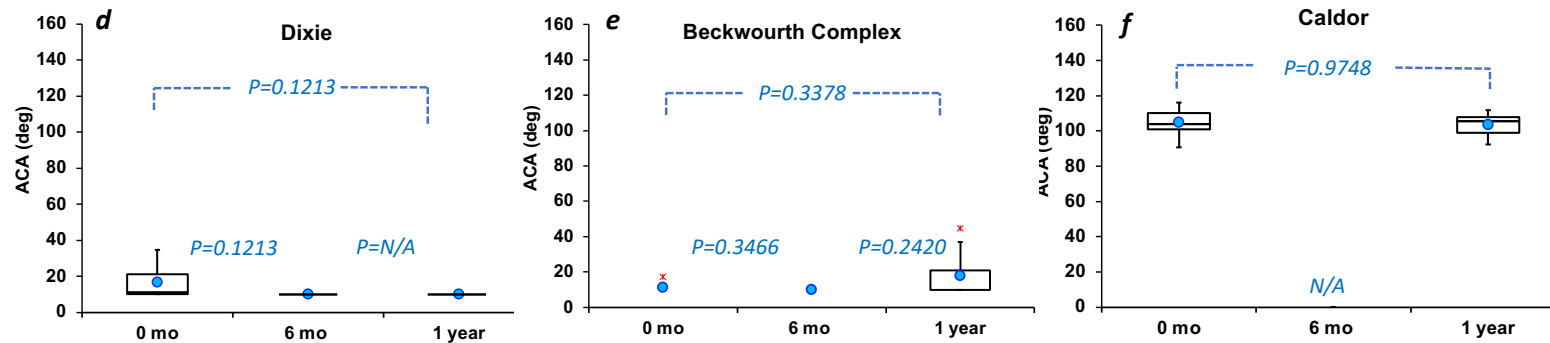

**Figure S8.** Results of WDPT and ACA measurements for burned soil samples: 0 month (2 weeks), 6 months, and 1 year after the fires containment;  $P$ -values were calculated using unpaired  $t$ -test ( $N=5-15$ ,  $\alpha=0.05$ ).

**Table S1.** Intensity weighted average sum parameter for the results of the TG APPI FT-ICR MS experiments. pyro – pyrolysis phase 1  
270–600 °C, TD – thermodesorption phase 20–270 °C, DBE – double-bond-equivalents, AI – aromaticity index. 2

| Fire name  | sample  | phase | number | DBE   | AI   | H/C  | O/C  |
|------------|---------|-------|--------|-------|------|------|------|
| Beckwourth | ash     | pyro  | 23     | 11.95 | 0.53 | 1.02 | 0.13 |
| Beckwourth | ash     | TD    | 11     | 8.27  | 0.37 | 1.29 | 0.13 |
| Beckwourth | control | pyro  | 454    | 8.54  | 0.37 | 1.32 | 0.09 |
| Beckwourth | control | TD    | 86     | 6.90  | 0.29 | 1.45 | 0.11 |
| Beckwourth | burned  | pyro  | 646    | 9.20  | 0.41 | 1.26 | 0.08 |
| Beckwourth | burned  | TD    | 231    | 7.56  | 0.31 | 1.41 | 0.11 |
| Caldor     | ash     | pyro  | 101    | 6.26  | 0.28 | 1.49 | 0.09 |
| Caldor     | ash     | TD    | 135    | 7.54  | 0.37 | 1.34 | 0.09 |
| Caldor     | control | pyro  | 1155   | 7.50  | 0.30 | 1.44 | 0.09 |
| Caldor     | control | TD    | 3819   | 10.44 | 0.36 | 1.32 | 0.07 |
| Caldor     | burned  | pyro  | 1148   | 7.76  | 0.31 | 1.42 | 0.09 |
| Caldor     | burned  | TD    | 3476   | 10.76 | 0.38 | 1.29 | 0.07 |
| Dixie      | control | pyro  | 274    | 7.09  | 0.29 | 1.45 | 0.10 |
| Dixie      | control | TD    | 290    | 6.69  | 0.27 | 1.48 | 0.10 |

3

4



**Table S2.** Compound class distribution with absolute intensities normalized to the sample mass. Herein, CHO refers to all compounds solely containing oxygen as heteroatom, likewise for the other heteroatom combinations. pyro – pyrolysis phase 270–600 °C, TD – thermodesorption phase 20–270 °C.

| Fire name  | sample   | phase | CH       | CHO      | CHNO     | CHOS     | CHN      | CHNS     |
|------------|----------|-------|----------|----------|----------|----------|----------|----------|
| Beckwourth | ash      | pyro  | 5.40E+06 | 5.55E+06 | 0        | 0        | 0        | 0        |
| Beckwourth | ash      | TD    | 1.03E+05 | 3.67E+06 | 0        | 0        | 0        | 0        |
| Beckwourth | unburned | pyro  | 6.33E+07 | 1.35E+08 | 0        | 0        | 5.52E+04 | 0        |
| Beckwourth | unburned | TD    | 1.11E+06 | 1.80E+07 | 0        | 0        | 0        | 0        |
| Beckwourth | burned   | pyro  | 1.74E+08 | 2.29E+08 | 7.56E+04 | 1.68E+05 | 3.16E+06 | 0        |
| Beckwourth | burned   | TD    | 1.40E+07 | 1.10E+08 | 0        | 2.92E+04 | 0        | 0        |
| Caldor     | ash      | pyro  | 1.75E+08 | 2.60E+08 | 0        | 0        | 0        | 0        |
| Caldor     | ash      | TD    | 1.48E+09 | 8.25E+08 | 0        | 0        | 3.28E+05 | 0        |
| Caldor     | unburned | pyro  | 1.59E+08 | 3.91E+08 | 3.80E+06 | 0        | 0        | 6.05E+05 |
| Caldor     | unburned | TD    | 8.29E+08 | 6.27E+09 | 2.42E+08 | 1.24E+06 | 2.81E+08 | 4.85E+06 |
| Caldor     | burned   | pyro  | 2.93E+08 | 7.26E+08 | 2.80E+06 | 0        | 0        | 6.49E+05 |
| Caldor     | burned   | TD    | 1.08E+09 | 5.61E+09 | 2.16E+08 | 2.44E+05 | 3.24E+08 | 5.11E+06 |
| Dixie      | unburned | pyro  | 1.99E+06 | 1.03E+08 | 0        | 0        | 0        | 0        |
| Dixie      | unburned | TD    | 3.38E+06 | 2.12E+08 | 0        | 0        | 0        | 0        |

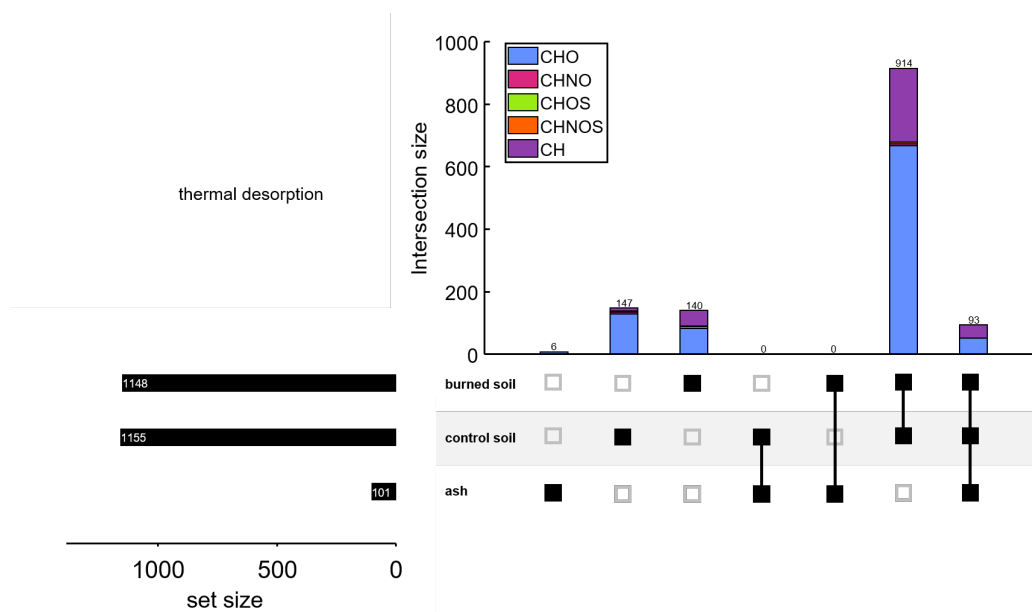

**Figure S9.** Upset plot of the averaged thermal desorption phase (20–270 °C) from all three Caldor fire soil samples (control pre-fire soil, burned post-fire soil, and ash). The compound class distribution for the respective interest is indicated by a color coded-stacked bar plot.

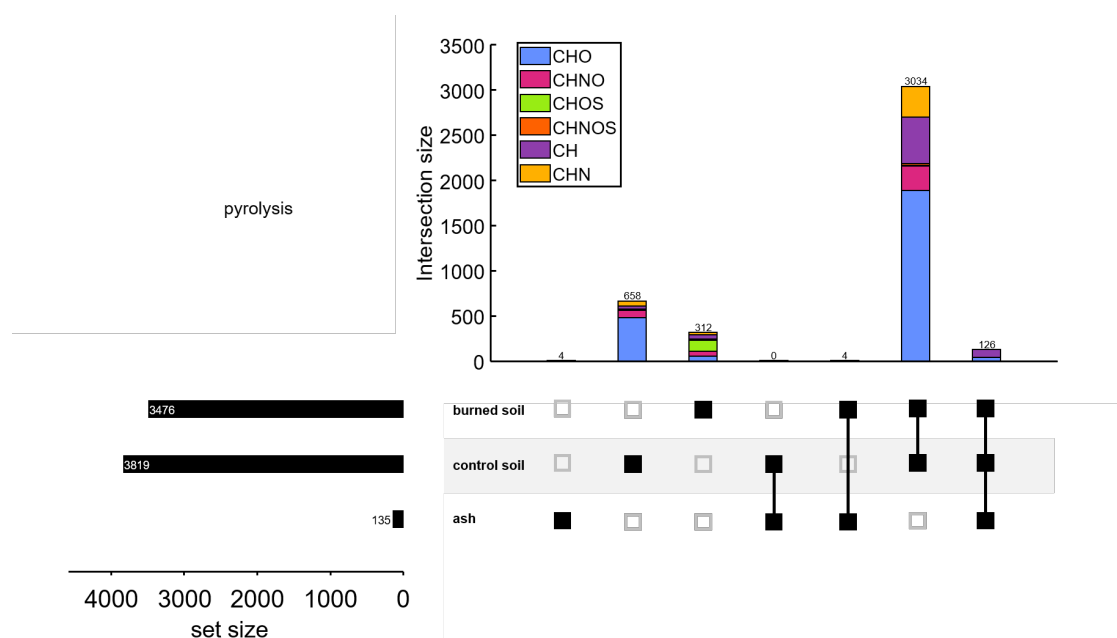

**Figure S10.** Upset plot of the averaged pyrolysis phase (270–600 °C) from all three Caldor fire soil samples (control pre-fire soil, burned post-fire soil, and ash). The compound class distribution for the respective interest is indicated by a color coded-stacked bar plot.
